# Supplementary material
Source: Springer Nature journal article supplement (https://www.springermedizin.de/resource/supplementary/13075_2011_3148_MOESM2_ESM.pdf/9693848)

## RA (n=17)

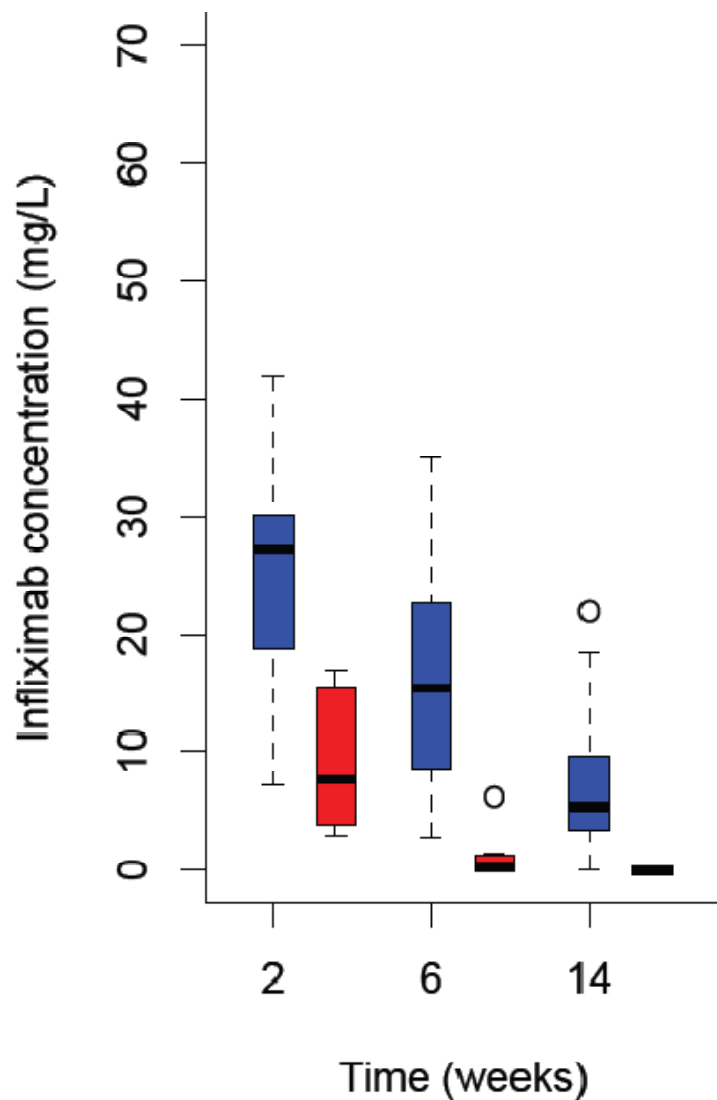

## SpA (n=91)

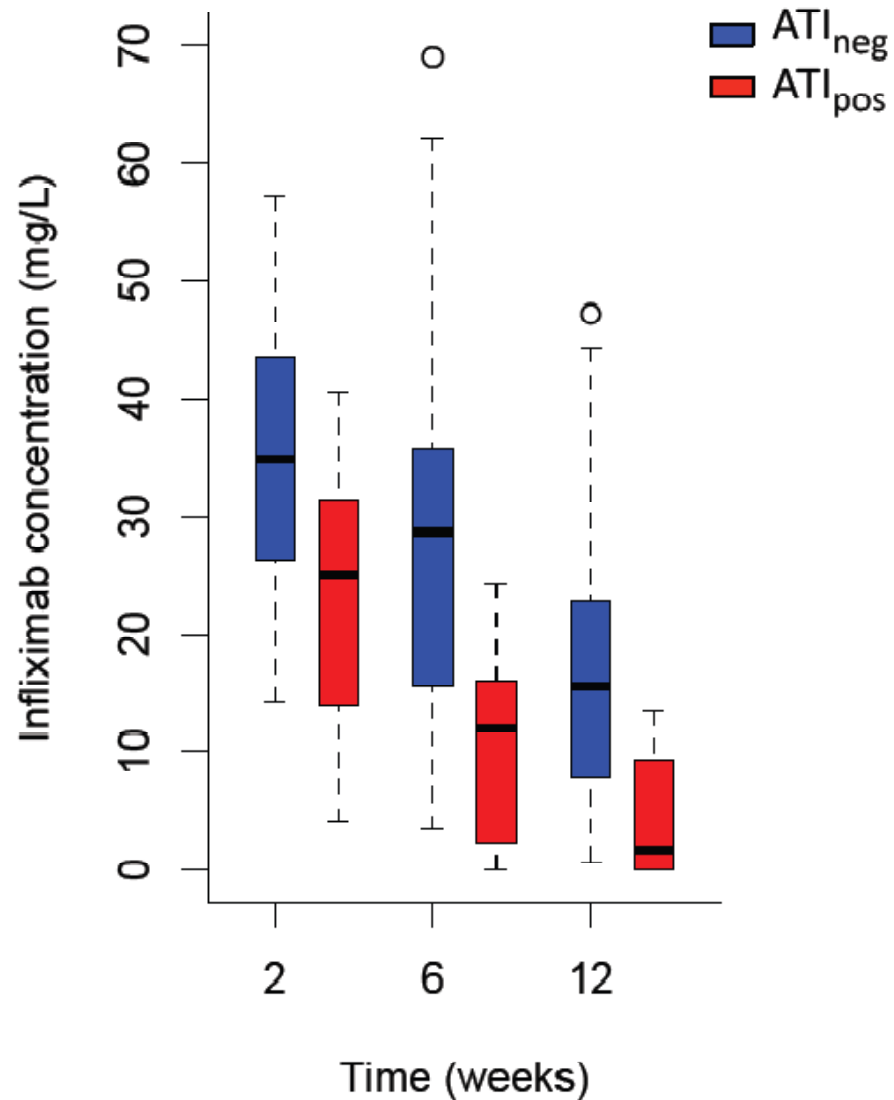

Supplement: MOESM2 [file 9693848]
